# Supplementary material for: Real-Time Imaging of the Bacillithiol Redox Potential in the Human Pathogen Staphylococcus aureus Using a Genetically Encoded Bacilliredoxin-Fused Redox Biosensor
Source: PubMed Central journal article supplement — Antioxid Redox Signal. 2017 May 20;26(15):835–48. doi: 10.1089/ars.2016.6733 (PMC5444506; doi:10.1089/ars.2016.6733), 2017-05-20
Supplement: Supp_Data.pdf [file Supp_Data.pdf]

## Supplementary Information for

# Real-time imaging of the bacillithiol redox potential in the human pathogen *Staphylococcus aureus* using a genetically encoded bacilliredoxin-fused redox biosensor

### Authors:

Vu Van Loi<sup>1</sup>, Manuela Harms<sup>2</sup>, Marret Müller<sup>3</sup>, Nguyen Thi Thu Huyen<sup>1</sup>, Chris Hamilton<sup>4</sup>, Falko Hochgräfe<sup>2</sup>, Pané-Farré<sup>3</sup> and Haike Antelmann<sup>1\*</sup>

### Departments & Institutions:

<sup>1</sup>*Institute for Biology-Microbiology, Freie Universität Berlin, D-14195 Berlin, Germany*

<sup>2</sup>*Junior Research Group Pathoproteomics and* <sup>3</sup>*Institute for Microbiology, Ernst-Moritz-Arndt-University of Greifswald, D-17487 Greifswald, Germany*

<sup>4</sup>*School of Pharmacy, University of East Anglia, Norwich Research Park, Norwich, NR4 7TJ, UK*

**Running title:** Bacilliredoxin-fused redox biosensor in *Staphylococcus aureus*

### \*Corresponding author:

Haike Antelmann, Institute for Biology-Microbiology, Freie Universität Berlin, Königin-Luise-Strasse 12-16, D-14195 Berlin, Germany,  
Tel.+49-(0)30-838-51221, Fax: +49-(0)30-838-451221

**E-mail:** [haike.antelmann@fu-berlin.de](mailto:haike.antelmann@fu-berlin.de)

### Supplemental Figure legends

**Figure S1. Multiple protein sequence alignments of the YphP/YqiW bacilliredoxin homologs from *B. subtilis*, *S. aureus* COL and USA300 and *Staphylococcus epidermidis*.** The bacilliredoxins YphP (BrxA) and YqiW (BrxB) of the UPF0403 family from *B. subtilis* were aligned with SACOL1464 and SACOL1558 from *S. aureus* COL, SAUSA300\_1321 and SAUSA300\_1463 from *S. aureus* USA300 and with SERP1006 and SERP1075 from *S. epidermidis*. The multiple sequence alignment was performed using ClustalW2 and presented using Jalview. Intensity of the blue color gradient is based on 50% identity. The conserved Cys residues are marked with asterisk (\*) and highlighted in red.

**Figure S2. The Brx-roGFP2 biosensor is not responsive to pH changes *in vitro*.** Recombinant Brx-roGFP2 was diluted into 0.1 M potassium phosphate buffer with pH values ranging from 5.8-7.9. The 405/488 nm fluorescence excitation ratio of fully reduced and oxidized Brx-roGFP2 was calculated at different pH values, emission was measured at 510nm (n=4, P=0.0637 Brx-roGFP2 pH 5.8 versus 7.8). Error bars represent standard deviations from the mean. Data are representative of 4 replicates and *P*-values were calculated using a Students unpaired two-tailed t-Test by the graph prism software.

**Figure S3. Western blot analysis of Brx-roGFP2 expression in *S. aureus* COL during the growth in LB medium.** *S. aureus* COL Brx-roGFP2 was grown in LB medium and crude protein extracts were analyzed at different times along the growth for Brx-roGFP2 expression using GFP-specific Western blot analysis. Brx-roGFP2 expression increases during the stationary phase in *S. aureus* COL. The protein size marker indicates that the Brx-roGFP2 protein migrates at the correct molecular weight of 46 kDa in *S. aureus* COL *in vivo*.

**Figure S4. Fluorescence excitation spectrum of Brx-roGFP2 expressed in *S. aureus* COL (A) and USA300 (B) at different growth phases (OD1, 3, 5) and the effect of the level of Brx-roGFP2 in COL and USA300 on OxD at OD=4 (C, D).**

**(A, B)** Fluorescence intensity and Brx-roGFP2 expression is much lower in USA300 during the log phase at OD1-3 compared to COL ( $n=2$ ;  $P=0.0001$  at OD 2.5).

**(C,D)** Comparison of serial dilutions of COL and USA300 cells harvested at OD=4 (undiluted, 1:2-fold and 1:3-fold dilutions) showed that the OxD at OD=4 remains constant (C) and is not affected by the different Brx-roGFP2 expression level due to the dilutions. The Brx-roGFP2 level in the different dilutions was analyzed using roGFP2-specific Western blot analysis (D). Mean values are shown and error bars represent the *s.e.m* and *P*-values were calculated using a Students unpaired two-tailed t-Test by the graph prism software.

**Figure S5. Comparison of the Brx-roGFP2 response in *S. aureus* COL and the natural *bshC* mutant strain RN4220 during the growth.** The Brx-roGFP2 biosensor is constitutively oxidized in the *S. aureus* RN4220 strain due to the natural *bshC* mutation of the NCTC8325-4 lineage ( $n=4$ ;  $P<0.0001$  in all samples). The oxidation degree was calculated based on 405/488 nm excitation ratios with emission at 510 nm and related to the fully oxidized and reduced controls as described in the Methods section. Mean values are shown and error bars represent the *s.e.m* and *P*-values were calculated using a Students unpaired two-tailed t-Test by the graph prism software.

**Figure S6. Quantification of Brx-roGFP2 amounts in *S. aureus* COL wild type and the *bshA* mutant during the growth in LB-medium.** **(A)** The protein samples were harvested from the *S. aureus* COL Brx-roGFP2 wild type and the *bshA* mutant at different time point along the growth curves. **(B)** Brx-roGFP2 expression was analyzed using Western blot analyses. **(C)** Purified His-tagged Brx-roGFP2 protein was used standard for calibration. **(D)** Quantification of Brx-roGFP2 in the *S. aureus* strains revealed similar expression levels in the wild type and the *bshA* mutant ( $n=2$ ;  $P=0.9346$  for Brx-roGFP2 amounts in all samples of

WT/*bshA*). Mean values are shown and error bars represent the *s.e.m* and *P*-values were calculated using a Students unpaired two-tailed t-Test by the graph prism software.

**Figure S7. BSH-specific non-reducing Western blot analysis of *S. aureus* COL, COL with empty vector pRB473 and COL Brx-roGFP2.** *S. aureus* COL, COL-pRB473 and COL Brx-roGFP2 strains were grown in LB medium to an OD<sub>540</sub> of 2.0, washed and transferred to Belitsky minimal medium and exposed to 100 µM NaOCl for 30 min. The proteins were extracted and subjected to non-reducing SDS-PAGE and BSH-specific Western blot analysis. The S-bacillithiolated proteins are increased especially in the 40 kDa range in all strains by NaOCl stress indicating that the Brx-roGFP2 probe does not affect the pattern of S-bacillithiolation.

**Figure S8. Responses of purified roGFP2 and Brx-roGFP2 proteins *in vitro* to H<sub>2</sub>O<sub>2</sub> and NaOCl.** Purified roGFP2 and Brx-roGFP2 proteins were exposed to 100 µM-10 mM H<sub>2</sub>O<sub>2</sub> (**A**, **B**) and 20-100 µM NaOCl *in vitro* (**C**, **D**). The oxidation degree was calculated based on 405/488 nm excitation ratios with emission at 510 nm and related to the fully oxidized and reduced controls. Mean values are shown and error bars represent the *s.e.m* and *P*-values were calculated using a Students unpaired two-tailed t-Test by the graph prism software.

# Figure S1

|               |    |                                               |           |                                           |            |                                           |           |
|---------------|----|-----------------------------------------------|-----------|-------------------------------------------|------------|-------------------------------------------|-----------|
| YphP          | 1  | MSMAYEEYMRQLVVP                               | RR        | ELTGAGFEELTTAEEVENFMEKA                   | - -        | EGTTLVVVNSVCGCAAGLARPAATQAVLQNDKTPDNTVTVF | 82        |
| YqiW          | 1  | MNMDFNLFMNDIVRQARQEITAAGYTELKTAAEVDEALTK      | - - -     | KGTTLVMVNSVCGCAGGIARPAAYHS-VHYDKR         | PDQLVTVF   | 80                                        |           |
| SACOL1464     | 1  | -MNAYDAYMKEIAQQMRGELTQNGFTSLETSEAVSEYMNQVNADD | TT        | FVINSTCGCAAGLARPAAVAVATQNEHRPTNTVTVF      | 83         |                                           |           |
| SACOL1558     | 1  | MDMNFDFLYMNGVVEQARNEIESAGYEQLTTAEDVDKVLKQ     | - -       | DGTTLVMINSVCGCAGGIARPAASHA-LHYDVL         | PDRLVTVF   | 80                                        |           |
| SAUSA300_1321 | 1  | -MNAYDAYMKEIAQQMRGELTQNGFTSLETSEAVSEYMNQVNADD | TT        | FVINSTCGCAAGLARPAAVAVATQNEHRPTNTVTVF      | 83         |                                           |           |
| SAUSA300_1463 | 1  | MDMNFDFLYMNGVVEQARNEIESAGYEQLTTAEDVDKVLKQ     | - -       | DGTTLVMINSVCGCAGGIARPAASHA-LHYDVL         | PDRLVTVF   | 80                                        |           |
| SERP1006      | 1  | -MNGYEAYMKELAQQMRAELTDNGFTSLETSDDVNQYMQNIDNDD | TT        | FVINSTCGCAAGLARPAAVAVAEQNEVKPDHKVTVF      | 83         |                                           |           |
| SERP1075      | 1  | MDLNFDFLYMNDVVEQARNEIEHAGYHQLTSAEDVDQVLQQ     | - - -     | KGTSLVMVNSVCGCAGGIARPAAAHA-LHYDKLPQRLVTVF | 80         |                                           |           |
|               |    |                                               |           |                                           |            | * *                                       |           |
| YphP          | 83 | AGQDKEATAKMR                                  | REYFTGQE  | PSSPSMALLK                                | KGKEVVHFI  | PRHEIEGHDMEEIMKNLTAAFDAHC                 | - - - 144 |
| YqiW          | 81 | AGQDKEATARA                                   | RDYFEGYPP | SSSPSFA                                   | IKDGGKIMKM | VERHEIEGHEPMAVVAKLQEAFEEYCEEV             | 145       |
| SACOL1464     | 84 | AGQDKEATATM                                   | REFI-QQAP | SSPSYALF                                  | KGQDLVYF   | MPREFIEGRDINDIAMDLKDAFDENCK               | - - 145   |
| SACOL1558     | 81 | AGQDKEATQRA                                   | REYFEGYAP | SSPSFALV                                  | KDGKITEMI  | ERHQIEGHVDMNVINQLQTLFNKYCEER              | 145       |
| SAUSA300_1321 | 84 | AGQDKEATATM                                   | REFI-QQAP | SSPSYALF                                  | KGQDLVYF   | MPREFIEGRDINDIAMDLKDAFDENCK               | - - 145   |
| SAUSA300_1463 | 81 | AGQDKEATQRA                                   | REYFEGYAP | SSPSFALV                                  | KDGKITEMI  | ERHQIEGHVDMNVINQLQTLFNKYCEER              | 145       |
| SERP1006      | 84 | AGQDKEATQTM                                   | RDYI-QQV  | SSPSYALF                                  | KGQHLVHF   | IPREHIEGRDINDIAMDLKDAFDENCQ               | - - 145   |
| SERP1075      | 81 | AGQDKEATQQA                                   | REYFEGYAP | SSPSFALI                                  | KDGGKITEMI | ERHQIEGHVMDVINQLQALFDKYCEER               | 145       |
|               |    |                                               |           |                                           |            |                                           | *         |

Figure S2

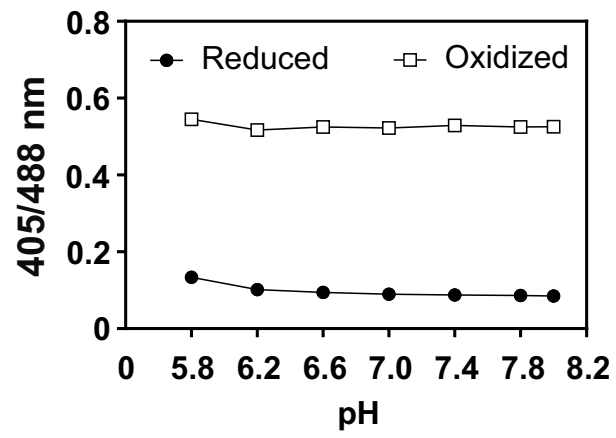

**Figure S3**

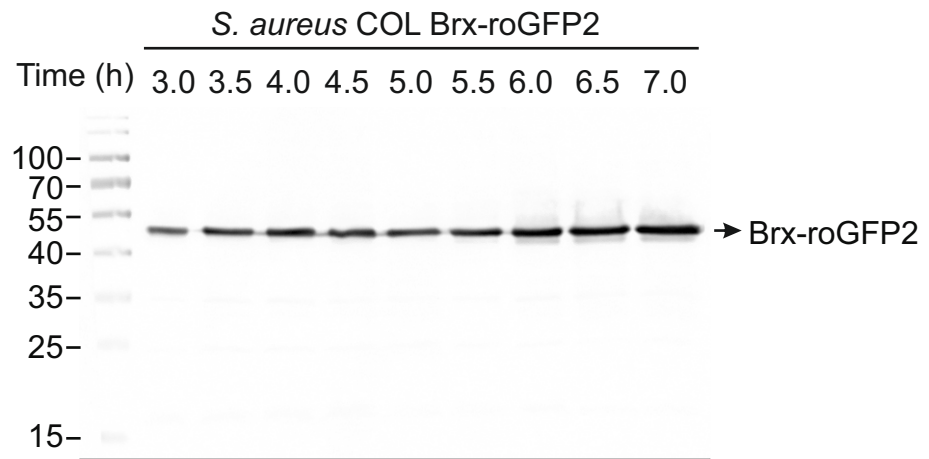

**Figure S4**

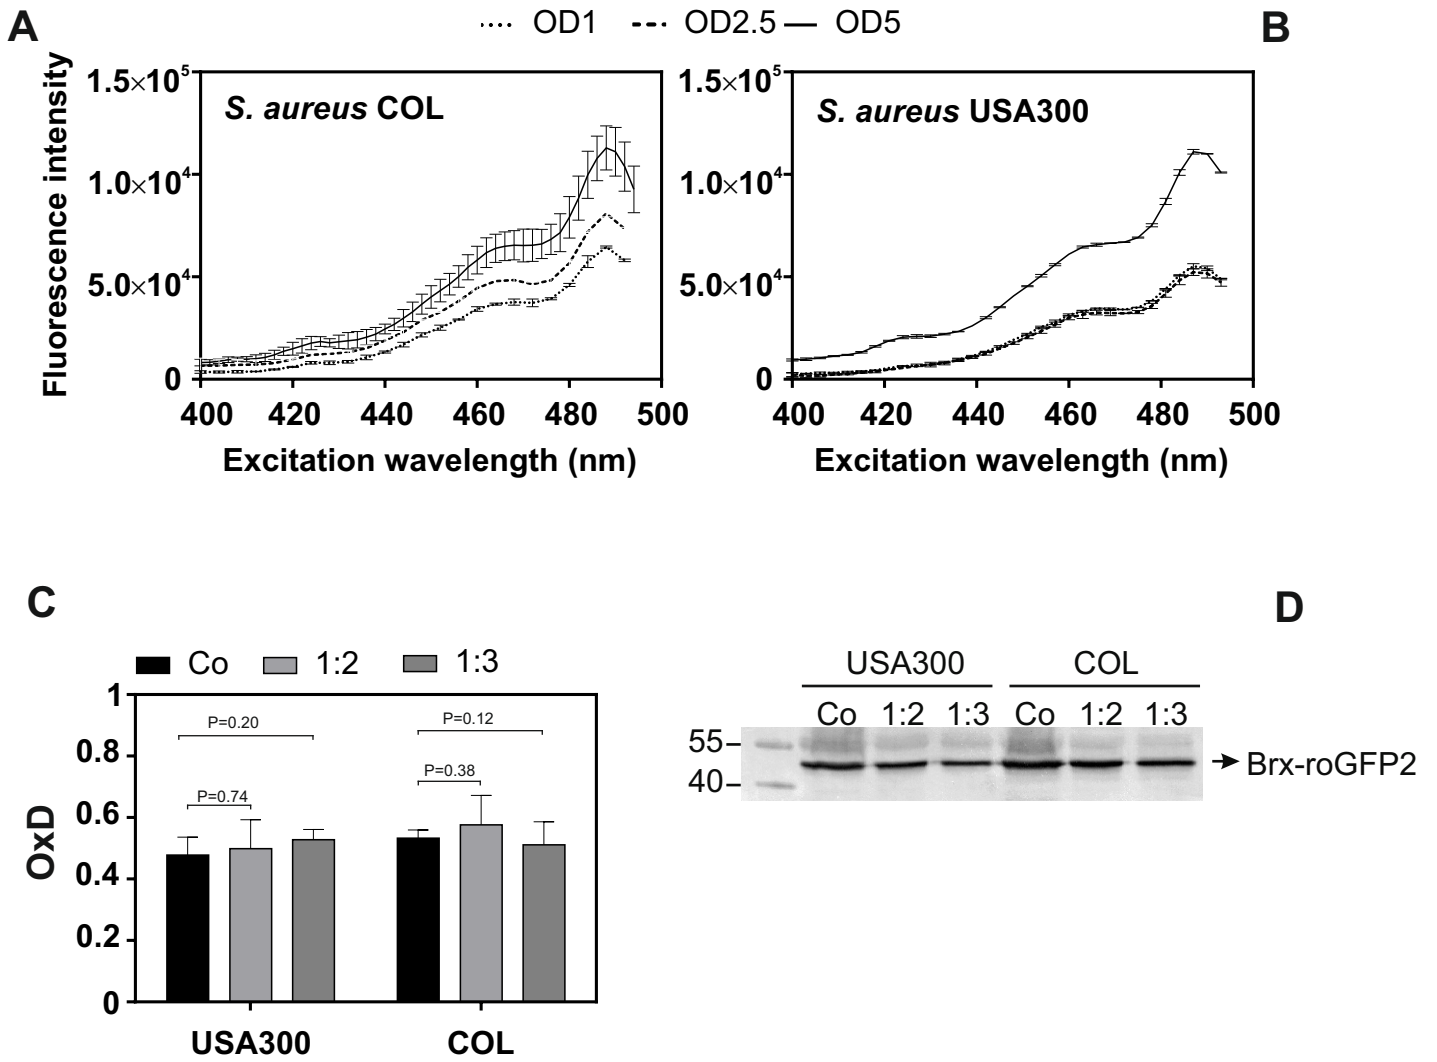



Figure S5

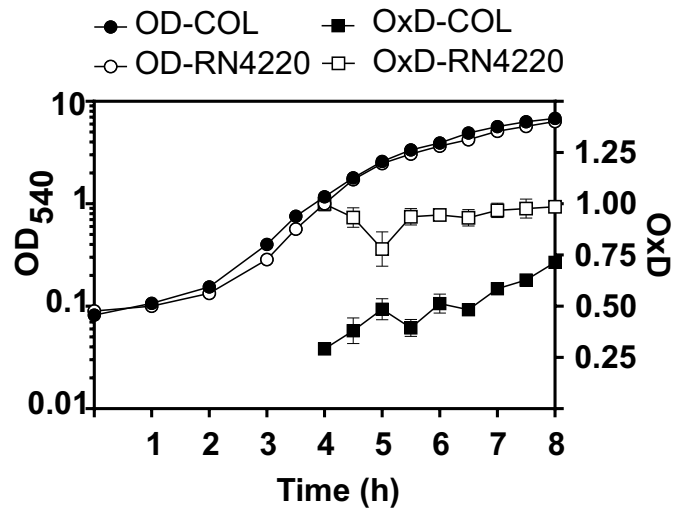

\*

Figure S6

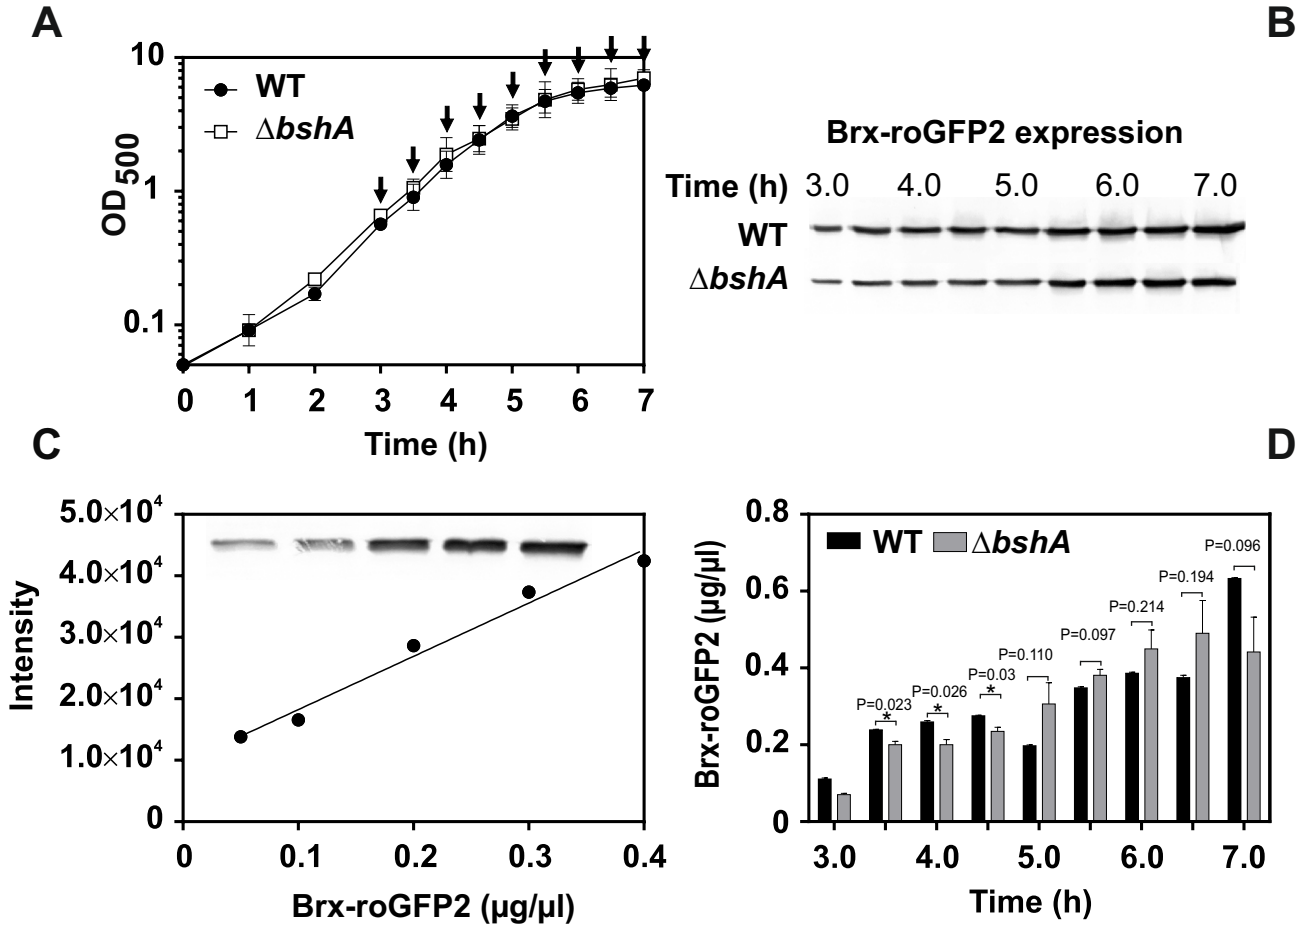

**Figure S7**

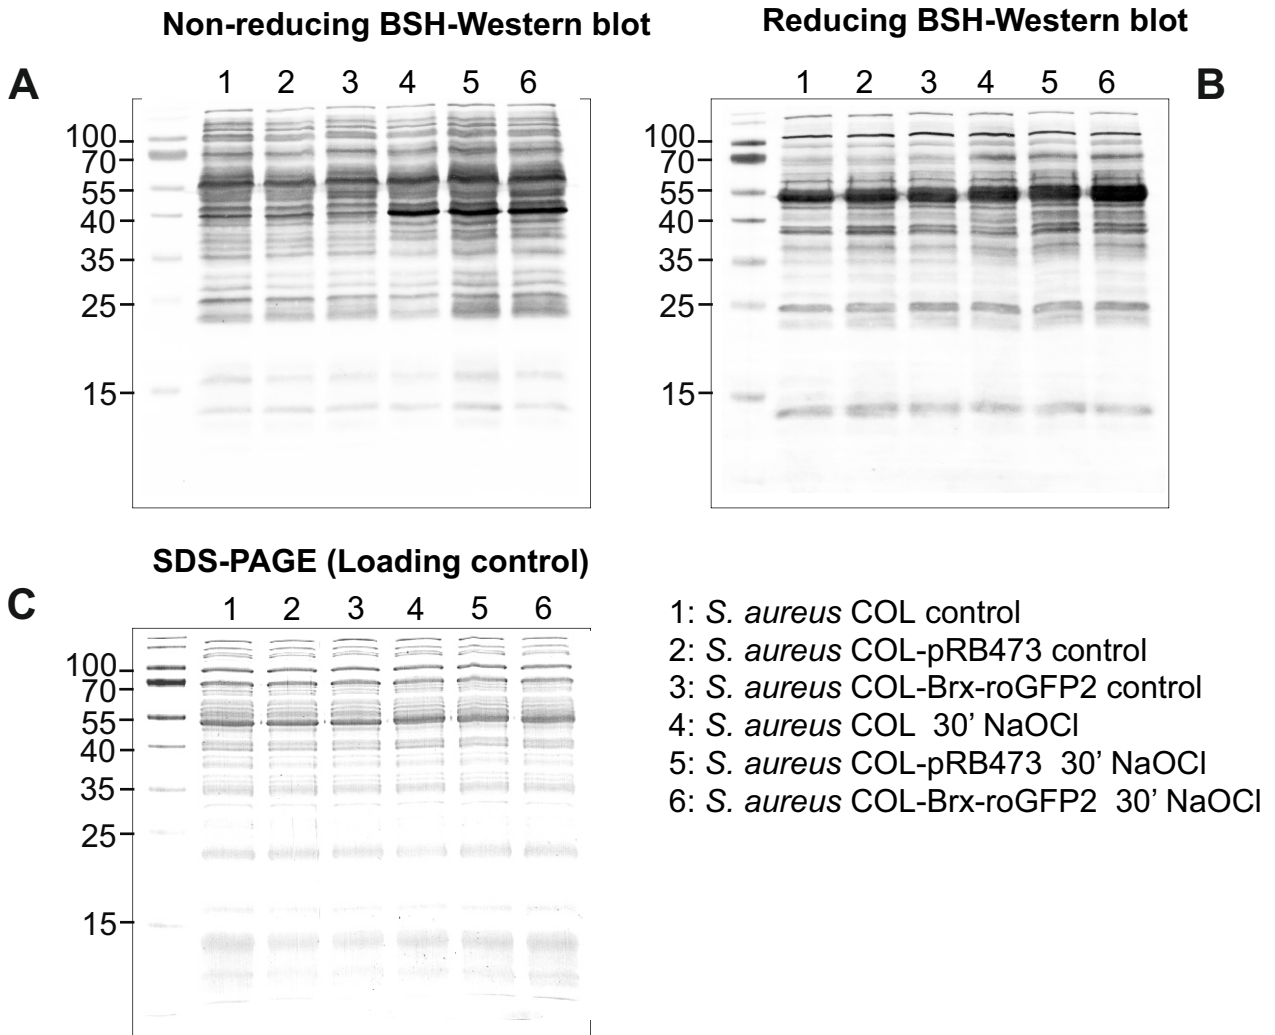

Figure S8

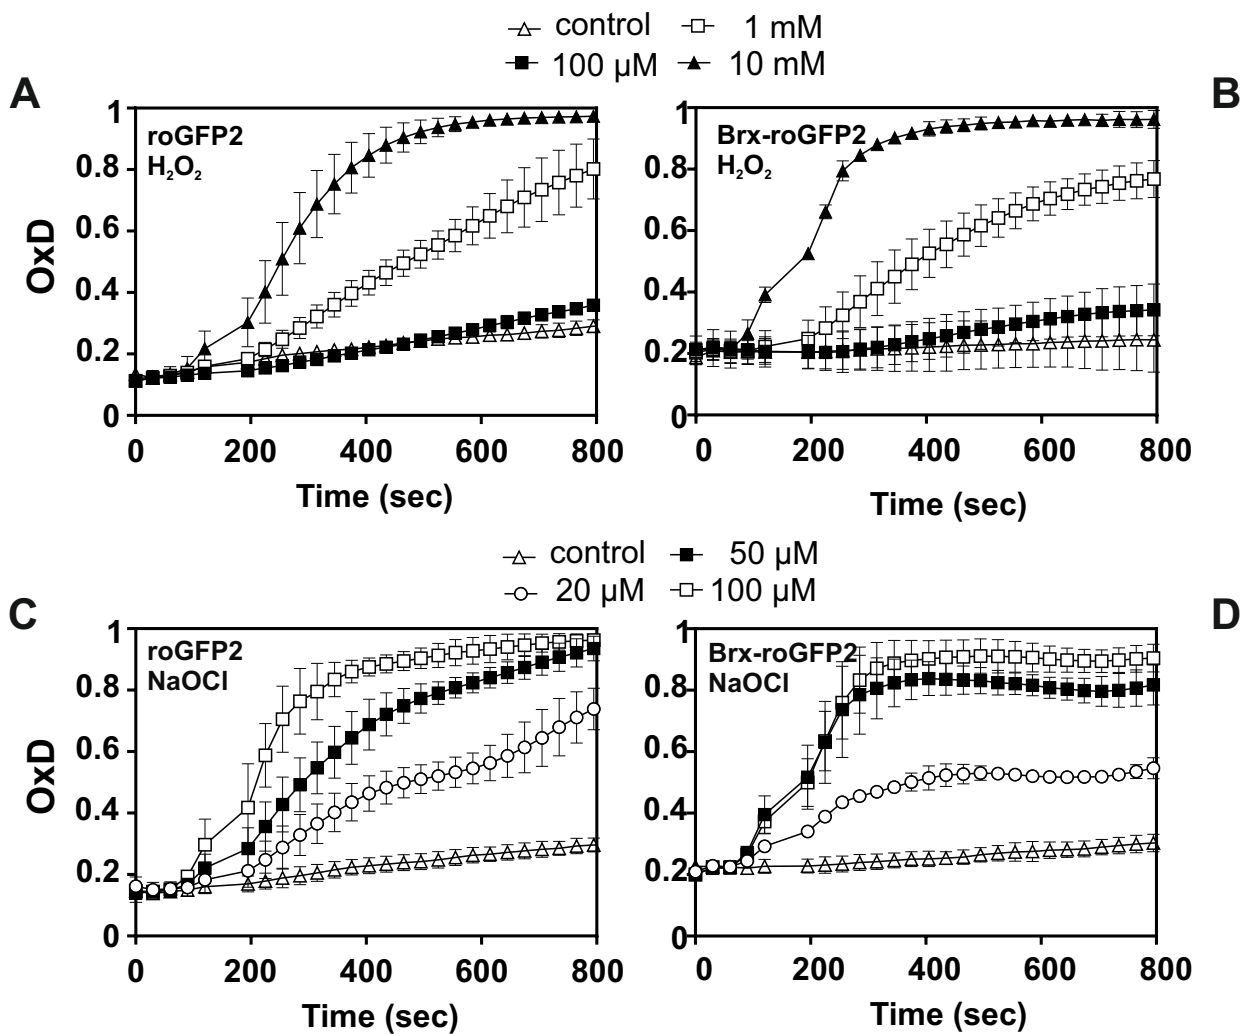

**Table S1: Bacterial strains**

| Strain                                   | Description                                                                                                                                                                                                                           | Reference  |
|------------------------------------------|---------------------------------------------------------------------------------------------------------------------------------------------------------------------------------------------------------------------------------------|------------|
| <b><i>Escherichia coli</i></b>           |                                                                                                                                                                                                                                       |            |
| DH5 $\alpha$                             | F- $\phi$ 80d <i>lacZ</i> $\Delta$ ( <i>lacZYA-argF</i> ) U169<br><i>deoR supE44</i> $\Delta$ <i>lacU169</i><br>(f80 <i>lacZDM15</i> ) <i>hsdR17 recA1</i><br><i>endA1</i> (rk- mk+) <i>supE44 gyrA96</i><br><i>thi1 gyrA69 relA1</i> | 1          |
| BL21(DE3) <i>plysS</i>                   | F- <i>ompT hsdS gal</i> (rb- mb+)<br>DE3( <i>sam7</i> $\Delta$ <i>nin5 lacUV5-T7 Gen1</i> )                                                                                                                                           | 1          |
| <b><i>Staphylococcus aureus</i></b>      |                                                                                                                                                                                                                                       |            |
| RN4220                                   | restriction negative strain/<br>MSSA cloning intermediate derived<br>from 8325-4                                                                                                                                                      | 2          |
| USA300                                   | CA-MRSA strain                                                                                                                                                                                                                        | 3          |
| COL                                      | Archaic HA-MRSA strain                                                                                                                                                                                                                |            |
| COL- $\Delta$ <i>bshA</i>                | COL <i>bshA</i> mutant                                                                                                                                                                                                                | 3          |
| USA300- $\Delta$ <i>bshA</i>             | USA300 <i>bshA</i> mutant                                                                                                                                                                                                             | 3          |
| COL-Brx-roGFP2                           | COL<br>pRB473- <i>brx-roGFP2</i>                                                                                                                                                                                                      | This study |
| COL-BrxAGC-roGFP2                        | COL<br>pRB473- <i>brxAGC-roGFP2</i>                                                                                                                                                                                                   | This study |
| COL-BrxCGA-roGFP2                        | COL<br>pRB473- <i>brxCGA-roGFP2</i>                                                                                                                                                                                                   | This study |
| COL-BrxAGA-roGFP2                        | COL<br>pRB473- <i>brxAGA-roGFP2</i>                                                                                                                                                                                                   | This study |
| COL- $\Delta$ <i>bshA</i> -Brx-roGFP2    | COL <i>bshA</i> mutant<br>pRB473- <i>brx-roGFP2</i>                                                                                                                                                                                   | This study |
| USA300-Brx-roGFP2                        | USA300<br>pRB473- <i>brx-roGFP2</i>                                                                                                                                                                                                   | This study |
| USA300- $\Delta$ <i>bshA</i> -Brx-roGFP2 | USA300 <i>bshA</i> mutant<br>pRB473- <i>brx-roGFP2</i>                                                                                                                                                                                | This study |
| RN4220-Brx-roGFP2                        | RN4220 pRB473- <i>brx-roGFP2</i>                                                                                                                                                                                                      | This study |
| <b><i>Staphylococcus</i> phage 80</b>    |                                                                                                                                                                                                                                       | 4          |

**Table S2: Plasmids**

| Plasmid                   | Description                                                                                                                                                      | Reference  |
|---------------------------|------------------------------------------------------------------------------------------------------------------------------------------------------------------|------------|
| pQE60-Grx1-roGFP2         | pQE60-derivative for overexpression of His-tagged Grx1-roGFP2                                                                                                    | 5          |
| pET11b                    | <i>E. coli</i> expression plasmid                                                                                                                                | Novagen    |
| pRB473                    | pRB373-derivative, <i>E. coli</i> / <i>S. aureus</i> shuttle vector, Amp <sup>r</sup> , Cm <sup>r</sup>                                                          | 6          |
| pRB473-XylR               | pRB373-derivative, <i>E. coli</i> / <i>S. aureus</i> shuttle vector, containing xylose-inducible P <sub>Xyl</sub> promoter<br>Amp <sup>r</sup> , Cm <sup>r</sup> | 7          |
| pQE60-Brx-roGFP2          | pQE60-derivative for overexpression of His-tagged Brx-roGFP2                                                                                                     | This study |
| pQE60-BrxAGC-roGFP2       | pQE60-derivative for overexpression of His-tagged BrxAGC-roGFP2                                                                                                  | This study |
| pQE60- BrxCGA-roGFP2      | pQE60-derivative for overexpression of His-tagged BrxCGA-roGFP2                                                                                                  | This study |
| pET11b-roGFP2             | pET11b-derivative for overexpression of His-tagged roGFP2                                                                                                        | This study |
| pET11b-Brx-roGFP2         | pET11b-derivative for overexpression of His-tagged Brx-roGFP2                                                                                                    | This study |
| pET11b-BrxAGC-roGFP2      | pET11b-derivative for overexpression of His-tagged BrxAGC-roGFP2                                                                                                 | This study |
| pET11b-BrxCGA-roGFP2      | pET11b-derivative for overexpression of His-tagged BrxCGA-roGFP2                                                                                                 | This study |
| pET11b-BrxAGA-roGFP2      | pET11b-derivative for overexpression of His-tagged BrxAGA-roGFP2                                                                                                 | This study |
| pRB473-XylR-Brx-roGFP2    | pRB473-derivative expressing Brx-roGFP2 under P <sub>Xyl</sub>                                                                                                   | This study |
| pRB473-XylR-BrxAGC-roGFP2 | pRB473-derivative expressing BrxAGC-roGFP2 under P <sub>Xyl</sub>                                                                                                | This study |
| pRB473-XylR-BrxCGA-roGFP2 | pRB473-derivative expressing BrxCGA-roGFP2 under P <sub>Xyl</sub>                                                                                                | This study |
| pRB473-XylR-BrxAGA-roGFP2 | pRB473-derivative expressing BrxAGA-roGFP2 under P <sub>Xyl</sub>                                                                                                | This study |

**Table S3. Oligonucleotide primers**

| Primer name                      | Sequence (5' to 3')                                            |
|----------------------------------|----------------------------------------------------------------|
| SAUSA300-1321yphP-FOR-BamHI-NcoI | GTGCCATGG <u>GGATCC</u> ATGAATGCATATGATGCTTATATG               |
| SAUSA300-1321yphP-REV-SpeI       | GCG <u>ACTAGT</u> TTTTACAATTTTCGTCAAAGGCA                      |
| SAUSA300-1321-yphP-C54A-REV      | TAATCCAGCTGCACAGCC <b>CGCT</b> GTAGAGTTAATAACTAC               |
| SAUSA300-1321-yphP-C54A-FOR      | GTAGTTATTA <b>ACTCTACAGCG</b> GGCTGTGCAGCTGGATTA               |
| SAUSA300-1321-yphP-C56A-REV      | TTGCTAATCCAGCTG <b>CCGCG</b> CCGCATGTAGAGTTAATAA               |
| SAUSA300-1321-yphP-C56A-FOR      | TAACTCTACATGCGGC <b>GCGG</b> CAGCTGGATTAGCAAGACC               |
| 1321-roGFP2-FOR-NheI             | CTAG <u>CTAGC</u> ATGAATGCATATGATGCTTATATGAAAG                 |
| 1321-brx-C54A56A-REV             | TAATCCAGCTGCCGCGCCCGCTGTAGAGTTAATAACTAC                        |
| 1321-brx-C54A56A-FOR             | GTAGTTATTACCTCTACAG <b>CGGGCGCGG</b> CAGCTGGATTA               |
| roGFP2-REV-BamHI                 | CGCGGATCCTTAGTGATGGTGATGGTGATGCTTGTACAG<br>CTCGTCCATGC         |
| roGFP2-FOR-NheI                  | CTAG <u>CTAGC</u> ATGGTGAGCAAGGGCGAGGAG                        |
| SAUSA300-1321-FOR-BamHI-2        | TAGGGATCCGAACAATTTAATTGGAGGAATTAATATGAA<br>TGCATATGATGCTTATATG |
| roGFP2-REV-KpnI-3                | CGGGG <u>TACCT</u> TA <b>CTT</b> GTACAGCTCGTCCATGCCGAG         |

Restriction sites are underlined and bold bases indicate point mutations

**Table S4: Typical Zeiss LSM510meta settings for imaging of Brx-roGFP2 in *S. aureus***

| Mode                               | Channel mode                                        |
|------------------------------------|-----------------------------------------------------|
| <b>Imaging setting</b>             |                                                     |
| Switch track                       | line                                                |
| Track 1                            | Argon/2 (458, 477, 488 and 514nm)+Transmitted light |
| Track 2                            | 405nm                                               |
| <b>Light path</b>                  |                                                     |
| Track 1+2                          | Emission filter BP 505-550nm                        |
| <b>Acquisition</b>                 |                                                     |
| Scan mode                          | Frame                                               |
| Frame size                         | 212 x 212                                           |
| Averaging number                   | 4                                                   |
| Scan time                          | 6.15sec                                             |
| Pixel Dwell                        | 7.73µsec                                            |
| Bit depth                          | 12bit                                               |
| zoom                               | 4.4                                                 |
| <b>Channel/ laser setting</b>      |                                                     |
| <b>488nm line</b>                  |                                                     |
| Maximum power                      | 30mW                                                |
| Laser line attenuator transmission | 20%                                                 |
| Pinhole                            | 1AU                                                 |
| Gain                               | 948                                                 |
| <b>405nm line</b>                  |                                                     |
| Maximum power                      | 30mW                                                |
| Laser line attenuator transmission | 8%                                                  |
| Pinhole                            | 1AU                                                 |
| Gain                               | 948                                                 |



**Table S5: BSH redox potential changes in *S. aureus* COL and *S. aureus* USA300 during growth**

| <i>S. aureus</i> COL |             |                 | <i>S. aureus</i> USA300 |             |                 |
|----------------------|-------------|-----------------|-------------------------|-------------|-----------------|
| Time (h)             | OD540       | $E_{BSH}$ (mV)  | Time (h)                | OD540       | $E_{BSH}$ (mV)  |
| 3                    | 0.86 ± 0.04 | -292.71 ± 4.98  | 3                       | 1.05 ± 0.05 | nd              |
| 4                    | 1.97 ± 0.09 | -301.60 ± 14.42 | 4.25                    | 3.61 ± 0.44 | -301.16 ± 18.19 |
| 4.5                  | 2.72 ± 0.30 | -281.44 ± 2.05  | 5                       | 5.1 ± 0.32  | -276.14 ± 10.99 |
| 5                    | 3.31 ± 0.26 | -280.29 ± 1.94  | 5.25                    | 5.54 ± 0.05 | -274.24 ± 10.72 |
| 6                    | 5.2 ± 0.86  | -280.12 ± 5.73  | 6.3                     | 6.2 ± 0.05  | -227.88 ± 13.14 |
| 7                    | 5.3 ± 0.62  | -271.94 ± 4.95  | 7                       | 6.33 ± 0.04 | -235.04 ± 19.18 |

nd: not determined

**Table S6: Effects of antibiotics on the changes of BSH redox potential inside *S. aureus* COL**

| Time<br>(h) | $E_{BSH}$ (mV)      |                             |                           |                         |                              |                              |                          |                    |                         |                           |                    |
|-------------|---------------------|-----------------------------|---------------------------|-------------------------|------------------------------|------------------------------|--------------------------|--------------------|-------------------------|---------------------------|--------------------|
|             | Control             | Erythromycin<br>0.1 $\mu$ M | Rifampicin<br>0.1 $\mu$ M | Vancomycin<br>5 $\mu$ M | Ciprofloxacin<br>0.1 $\mu$ M | Gentamicin<br>0.5 $\mu$ g/ml | Ampicillin<br>10 $\mu$ M | Fosfomycin<br>50nM | Lincomycin<br>5 $\mu$ M | Linezolid<br>2 $\mu$ g/ml | Oxacillin<br>2mM   |
| 0           | -286.22 $\pm$ 21.21 | -282.75 $\pm$ 4.48          | -280.53 $\pm$ 6.40        | -272.50 $\pm$ 1.21      | -270.49 $\pm$ 4.24           | -272.92 $\pm$ 4.91           | -281.49 $\pm$ 1.57       | -282.79 $\pm$ 4.53 | -278.26 $\pm$ 4.87      | -277.41 $\pm$ 3.86        | -283.58 $\pm$ 0.96 |
| 1           | -277.47 $\pm$ 4.15  | -283.48 $\pm$ 1.44          | -276.81 $\pm$ 5.88        | -267.38 $\pm$ 6.31      | -273.69 $\pm$ 3.34           | -270.55 $\pm$ 1.21           | -283.29 $\pm$ 0.49       | -284.07 $\pm$ 8.32 | -276.47 $\pm$ 2.32      | -289.84 $\pm$ 6.34        | -289.69 $\pm$ 1.77 |
| 2           | -279.24 $\pm$ 1.83  | -272.96 $\pm$ 8.28          | -273.98 $\pm$ 2.50        | -267.69 $\pm$ 3.58      | -273.70 $\pm$ 1.69           | -271.45 $\pm$ 2.58           | -275.37 $\pm$ 5.49       | -282.13 $\pm$ 4.10 | -280.24 $\pm$ 7.20      | -286.12 $\pm$ 4.27        | -284.90 $\pm$ 0.53 |
| 3           | -277.10 $\pm$ 3.33  | -271.00 $\pm$ 14.98         | -268.47 $\pm$ 1.68        | -269.00 $\pm$ 3.56      | -274.00 $\pm$ 1.86           | -265.97 $\pm$ 2.49           | -273.14 $\pm$ 3.02       | -275.65 $\pm$ 6.77 | -272.51 $\pm$ 1.32      | -278.92 $\pm$ 4.60        | -280.22 $\pm$ 1.83 |
| 4           | -265.45 $\pm$ 5.74  | -244.30 $\pm$ 58.37         | -267.72 $\pm$ 4.90        | -255.50 $\pm$ 4.72      | -267.24 $\pm$ 3.35           | -269.54 $\pm$ 2.78           | -263.87 $\pm$ 8.47       | -269.55 $\pm$ 10   | -282.31 $\pm$ 1.32      | -266.85 $\pm$ 3.83        | -270.80 $\pm$ 2.65 |

**Table S7: Response of Brx-roGFP2 in *S. aureus* COL during phagocytosis assays with THP-1 macrophages.**

| Excitation wavelength (nm) | MFI 100% Reduced | MFI Infected     | MFI 100 % Oxidized |
|----------------------------|------------------|------------------|--------------------|
| 405                        | 561.66 ± 21.73   | 663.11 ± 34.19   | 655.33 ± 23.35     |
| 488                        | 2953 ± 172.98    | 2252.11 ± 106.06 | 2095.66 ± 88.69    |
| 405/488                    | 0.19 ± 0.01      | 0.29 ± 0.02      | 0.31 ± 0.02        |

THP-1 cells were infected with *S. aureus* COL Brx-roGFP2 for 1 hour at MOI 25, blocked with 10 mM NEM and analyzed by flow cytometry. Emission was measured at 515-545 nm after excitation at 405 and 488 nm. The 405/488 nm ratios of the average mean fluorescence intensities (MFI) of infected macrophages was related to that of fully reduced and oxidized macrophages to calculate the oxidation degree during infection. The Brx-roGFP2 biosensor is 90% oxidized in *S. aureus* COL during infection of THP-1 macrophages. The mean values of 3 experiments are shown, error bars represent the *s.e.m* and P-values were calculated using a Students unpaired two-tailed t-Test by the graph prism software.

## REFERENCES

1. Studier, F.W. & Moffatt, B.A. Use of Bacteriophage-T7 RNA-Polymerase to Direct Selective High-Level Expression of Cloned Genes. *Journal of Molecular Biology* **189**, 113-130 (1986).
2. Kreiswirth, B.N. et al. The toxic shock syndrome exotoxin structural gene is not detectably transmitted by a prophage. *Nature* **305**, 709-12 (1983).
3. Posada, A.C. et al. Importance of bacillithiol in the oxidative stress response of *Staphylococcus aureus*. *Infect Immun* **82**, 316-32 (2014).
4. Rosenblum, E.D. & Tyrone, S. Serology, Density, and Morphology of Staphylococcal Phages. *J Bacteriol* **88**, 1737-42 (1964).
5. Gutscher, M. et al. Real-time imaging of the intracellular glutathione redox potential. *Nat Methods* **5**, 553-9 (2008).
6. Bruckner, R., Wagner, E. & Gotz, F. Characterization of a sucrose gene from *Staphylococcus xylosum*. *J Bacteriol* **175**, 851-7 (1993).
7. Pother, D.C. et al. Distribution and infection-related functions of bacillithiol in *Staphylococcus aureus*. *Int J Med Microbiol* **303**, 114-23 (2013).
